# Supplementary material for: Optimization of loosely coupled inductive data transfer systems by non-Foster impedance matching
Source: Copernicus journal article supplement (doi:10.5194/ars-17-151-2019), 2019-09-19
Supplement: Supplementary file 1 [file ars-17-151-2019-supplement.zip]

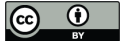

*Supplement of*

## **Optimization of loosely coupled inductive data transfer systems by non-Foster impedance matching**

**Christian Schmidt et al.**

*Correspondence to:* Christian Schmidt ([christian.schmidt@htwsaar.de](mailto:christian.schmidt@htwsaar.de))

- [ars-17-151-2019-supplement-title-page.pdf](#)
- [coils.s2p](#)
- [compensated\\_coils.s2p](#)
- [inverted\\_coupled.s2p](#)

The copyright of individual parts of the supplement might differ from the CC BY 4.0 License.
